# Supplementary material
Source: MDPI journal article supplement (https://www.mdpi.com/2079-8954/8/1/8)
Supplement: s1 [file s1]

## Supplemental Material Full Estimated Marginal Mean Tables

**Table S1.** Estimated Marginal Means and Standard Errors for Trustworthiness by Conditions and Time.

| Time | Comments    | M (SE)      | M (SE)      |
|------|-------------|-------------|-------------|
|      |             | Human       | GenProg     |
| 1    | Comments    | 4.94 (0.44) | 3.54 (0.44) |
|      | No Comments | 5.17 (0.46) | 4.57 (0.48) |
| 2    | Comments    | 5.00 (0.44) | 4.13 (0.44) |
|      | No Comments | 4.85 (0.46) | 4.38 (0.46) |
| 3    | Comments    | 5.11 (0.45) | 3.86 (0.45) |
|      | No Comments | 4.81 (0.46) | 4.29 (0.46) |
| 5    | Comments    | 4.83 (0.44) | 3.14 (0.49) |
|      | No Comments | 5.46 (0.48) | 3.69 (0.46) |

$N = 50$ . Note that the estimated marginal means correspond to predicted means from the full linear mixed effects model.

**Table S2.** Estimated Marginal Means and Standard Errors for Trust Intentions by Conditions and Time

| Time | Commenting    | M (SE)      | M (SE)      |
|------|---------------|-------------|-------------|
|      |               | Human       | GenProg     |
| 1    | Commenting    | 3.16 (0.22) | 2.77 (0.21) |
|      | No Commenting | 3.52 (0.21) | 2.92 (0.23) |
| 5    | Commenting    | 2.86 (0.22) | 2.17 (0.21) |
|      | No Commenting | 3.10 (0.21) | 2.27 (0.23) |

$N = 49$ .

**Table S3.** Marginal Means and Standard Errors for Reuse by Conditions and Time.

| Time | Commenting    | M (SE)      | M (SE)       |
|------|---------------|-------------|--------------|
|      |               | Human       | GenProg      |
| 1    | Commenting    | 1.01 (0.75) | -0.63 (0.74) |
|      | No Commenting | 1.94 (0.90) | 0.48 (0.77)  |
| 2    | Commenting    | 1.01 (0.75) | -0.21 (0.72) |
|      | No Commenting | 1.35 (0.81) | 0.48 (0.75)  |
| 3    | Commenting    | 0.59 (0.72) | -0.52 (0.76) |
|      | No Commenting | 0.42 (0.74) | 0.01 (0.77)  |
| 5    | Commenting    | 1.48 (0.80) | -1.57 (0.83) |
|      | No Commenting | 1.35 (0.81) | -0.96 (0.81) |

$N = 50$ . Values are on the logit scale.
